# Supplementary material for: Ultrasmall calcium-enriched Prussian blue nanozymes promote chronic wound healing by remodeling the wound microenvironment
Source: Royal Society of Chemistry journal article supplement (doi:10.1039/d3tb02065g), 2023-01-01
Supplement: d3tb02065g1.pdf [file d3tb02065g1.pdf]

# **Ultrasmall Calcium-enriched Prussian Blue Nanozymes Promote Chronic Wound Healing by Remodeling Wound Microenvironment**

Qingrong Dong<sup>a,b,c</sup>, Ge Fang<sup>b\*</sup>, Fang Liu<sup>b,d</sup>, Shuwei Cai<sup>b</sup>, Yujie Tao<sup>b</sup>, Tingyu Xue<sup>a,b,c</sup>,  
Ming hua Tang<sup>e</sup>, Kun Zhang<sup>d</sup>, Ziheng An<sup>b</sup>, Jiangfeng Du<sup>a,c,d\*</sup>, Hui Zhang<sup>a,c\*</sup>

<sup>a</sup>Department of Medical Imaging, First Hospital of Shanxi Medical University, Shanxi Key Laboratory of Intelligent Imaging and Nanomedicine, Taiyuan 030001, China

<sup>b</sup>State Key Laboratory of Radiation Medicine and Protection, School of Radiation Medicine and Protection, School for Radiological and Interdisciplinary Sciences (RAD-X), Collaborative Innovation Center of Radiation Medicine of Jiangsu Higher Education Institutions, Soochow University, Suzhou 215123, China

<sup>c</sup>Intelligent Imaging Big Data and Functional Nano-imaging Engineering Research Center of Shanxi Province, Taiyuan 030001, China

<sup>d</sup>College of Pharmacy, Shanxi Medical University, Jinzhong 030619, China

<sup>e</sup>Analysis and Testing Center, Soochow University, Suzhou 215123, China

\*Corresponding authors: gfang@suda.edu.cn (G. Fang); dujf@sxmu.edu.cn (J. Du); zhang\_hui@sxmu.edu.cn (H. Zhang).

## **Methods**

### **1. Cell cultures and CCK-8 Analysis**

HUVEC cells were cultured in Dulbecco's Modified Eagle's Medium (DMEM) medium (Gibco, China) containing 1% penicillin G sodium/streptomycin sulfate and 5% fetal bovine serum (FBS) (Gibco, China). The survival rate of HUVECs following various treatments was determined using CCK-8. After HUVECs were exposed to various concentrations of CaPB NPs and incubated for 24 h, HUVECs were washed three times using sterile buffer and subsequently incubated with 90  $\mu$ L of fresh culture medium and 10  $\mu$ L of CCK-8 solution. Then, HUVECs were exposed to 37 °C for 2 h, and the absorbance at 450 nm was analyzed with a microplate reader to quantify the cell viability.

### **2. Detection of intracellular ROS**

The generation of intracellular ROS was identified by DCFHDA detector. DCFH can be converted by the intracellular ROS into fluorescent DCF, which serves as a ROS level indicator. Cells were pre-treated with  $\text{H}_2\text{O}_2$  (1mM) for 2 h in the 6-well. Next, the cells were treated with CaPB NPs and USPBs separately for 4 h. Then, the cells were treated with 10  $\mu\text{M}$  DCFH-DA at 37 °C for 30 min in the incubator. After washing with PBS three times, DCF fluorescence staining photos were imaged by fluorescence microscopy (Ex/Em = 488/525 nm). ImageJ software was utilized to calculate the respective fluorescence intensity, and the results are presented as percentages after normalization to the control.

### **3. Hemolytic activity test of CaPB NPs and USPBs**

Red blood cells (RBC) from fresh mouse blood were treated individually with different concentrations of CaPB NPs and USPBs for an hour at 37 °C. Then the supernatant was collected through centrifugation (1500 rpm, 10 minutes), the absorbance at 540 nm was determined using a microplate reader. The negative or positive control, respectively, was RBC treated with PBS or  $\text{H}_2\text{O}$ .

### **4. Detection of stability of CaPB NPs**

To study the stability of CaPB NPs, the dialysis bag containing CaPB NPs (100 mg) was immersed in solution with PBS or ultra purified water. After 24 h, the ion concentrations in the solution were quantified by ICP-OES and the corresponding NPs were characterized by FTIR and XPS spectroscopy, respectively.

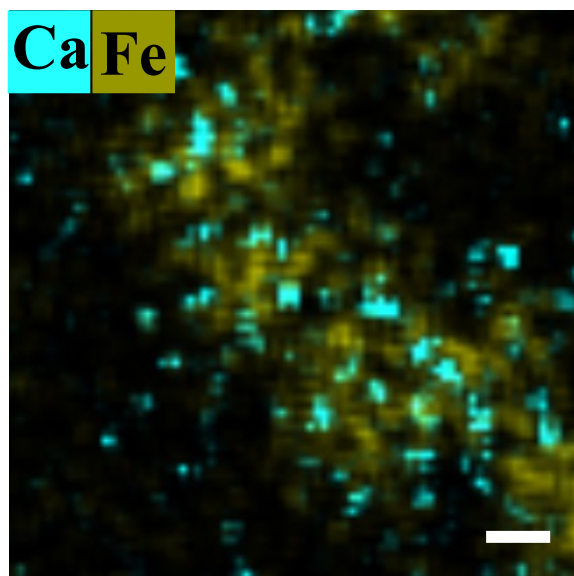

**Fig S1.** EDS mapping of CaPB NPs. The scale bar represents 20 nm.

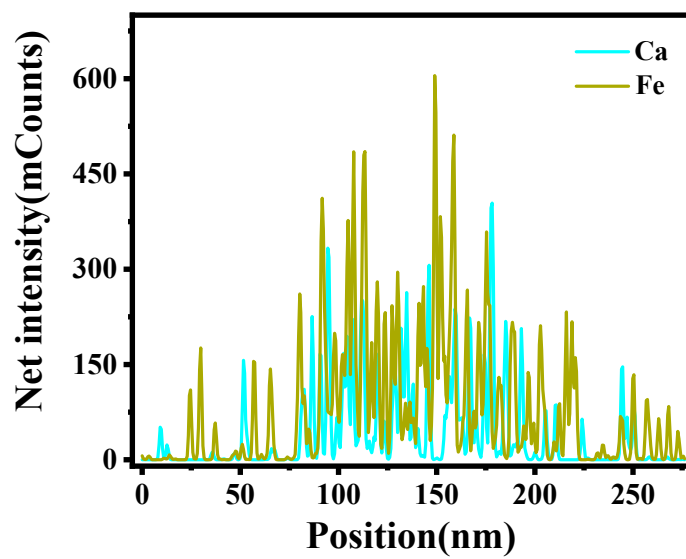

**Fig S2.** The corresponding line-scan TEM-EDS elemental distribution curves of Ca, Fe in CaPB NPs.

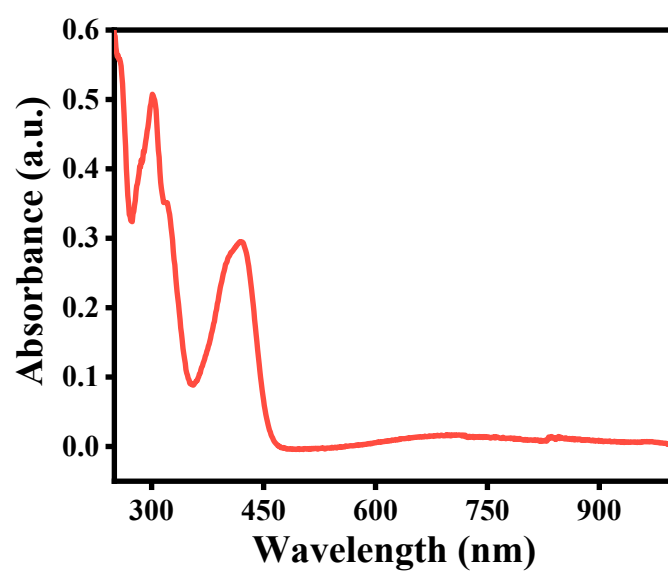

**Fig S3.** Absorption spectrum of CaPB NPs.

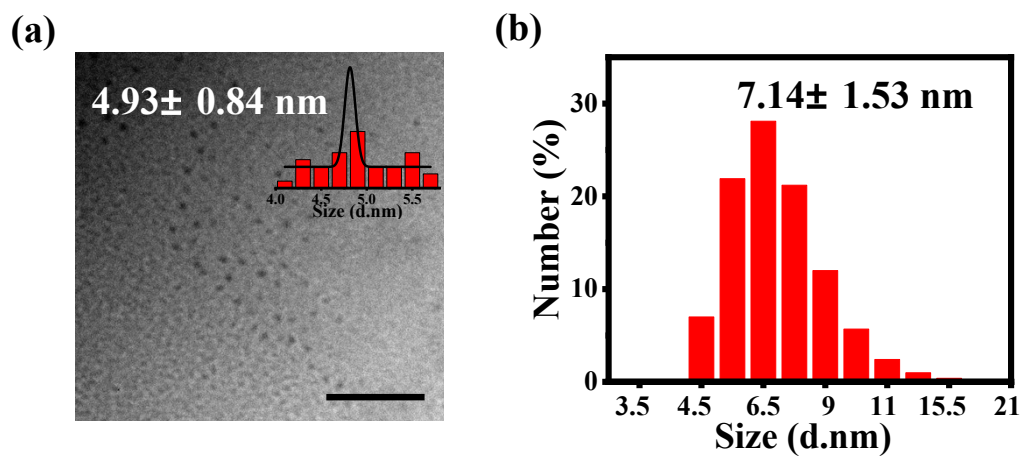

**Fig S4.** (a) TEM image of USPBs. The scale bar represents 50 nm. Inset represented the size distribution analyzed by Nano measure software. (d) DLS data of USPBs.

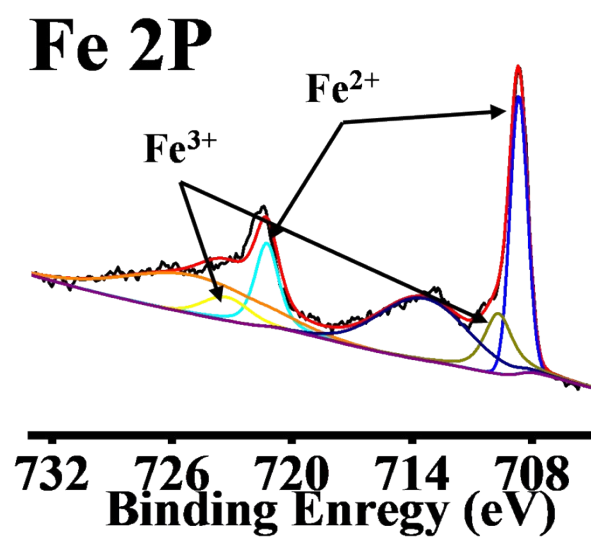

**Fig S5.** High resolution XPS spectra of USPBs in the Fe 2p region.

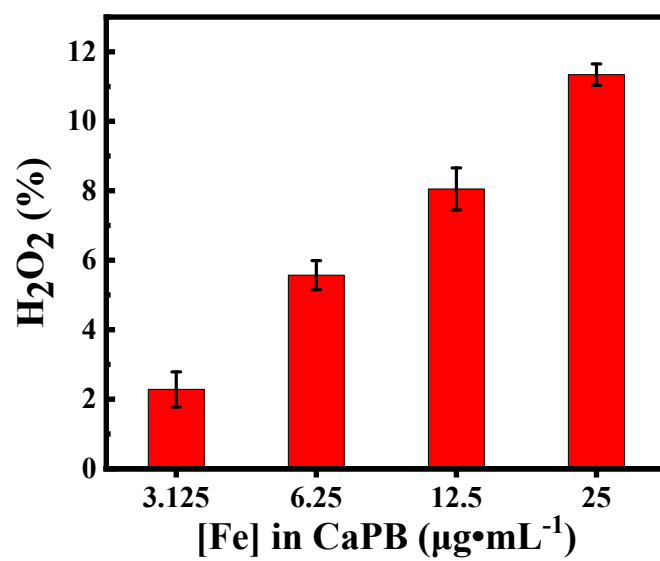

**Fig S6.** H<sub>2</sub>O<sub>2</sub> degradation catalyzed by CaPB NPs through CAT mimics.

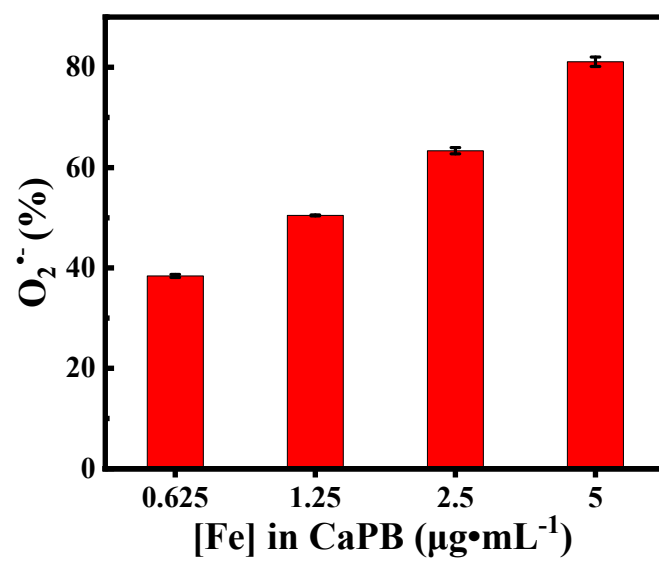

**Fig S7.** The  $O_2^{\bullet-}$  scavenging rate of CaPB NPs.

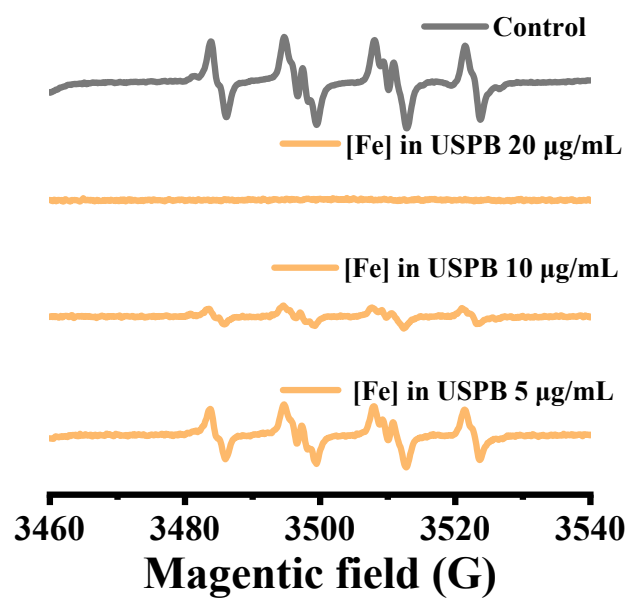

**Fig S8.** ESR spectra of USPBs for determining the SOD-like activity.

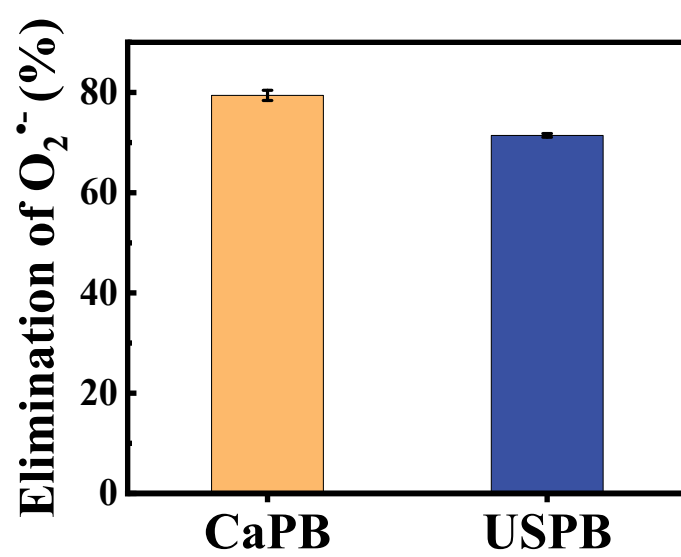

**Fig S9.** The  $O_2^{\bullet-}$  scavenging rate of CaPB NPs and USPBs.

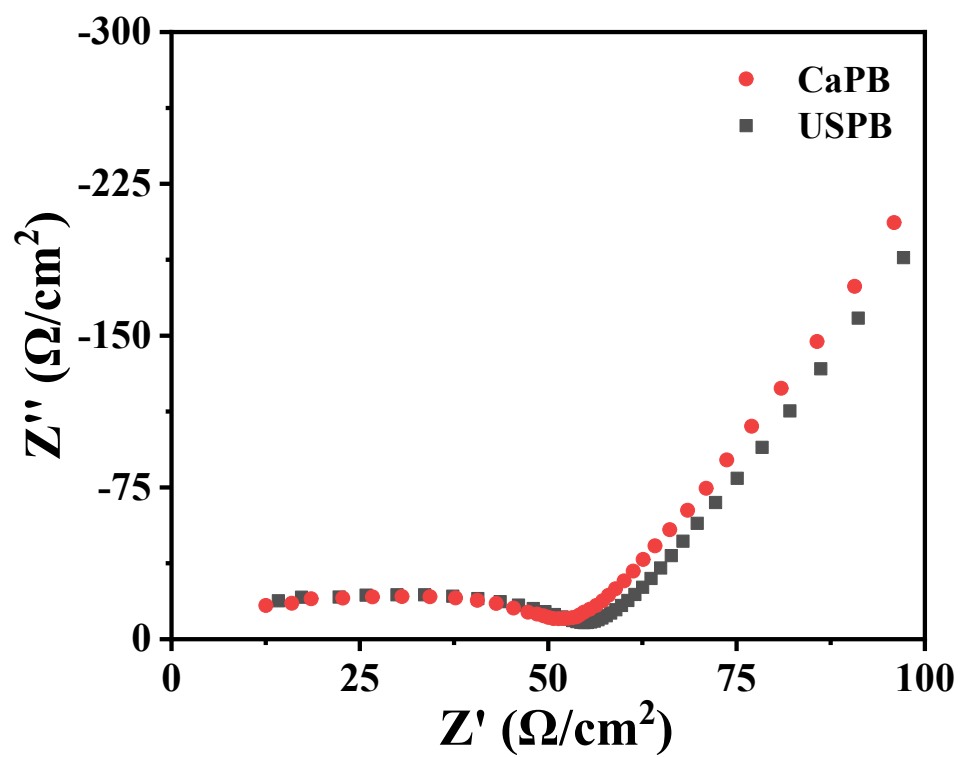

**Fig S10.** Electrochemical impedance spectroscopy plots of CaPB NPs and USPBs.

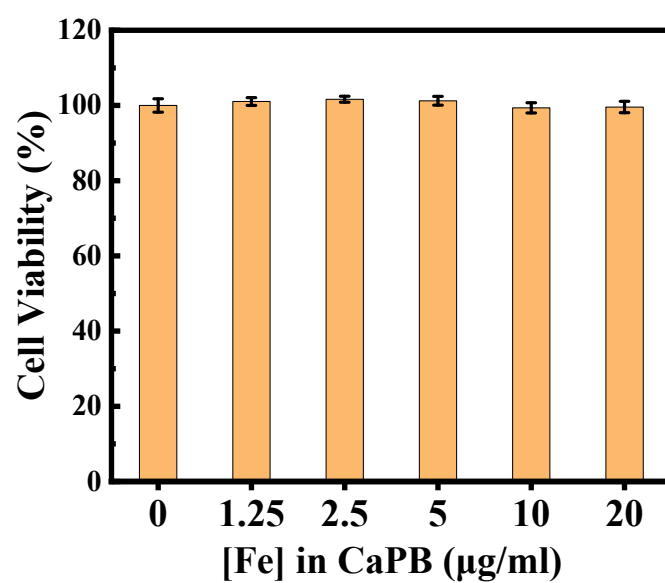

**Fig S11.** The cytotoxicity of CaPB NPs in HUVEC cells (n = 3, data are shown as mean  $\pm$  SD).

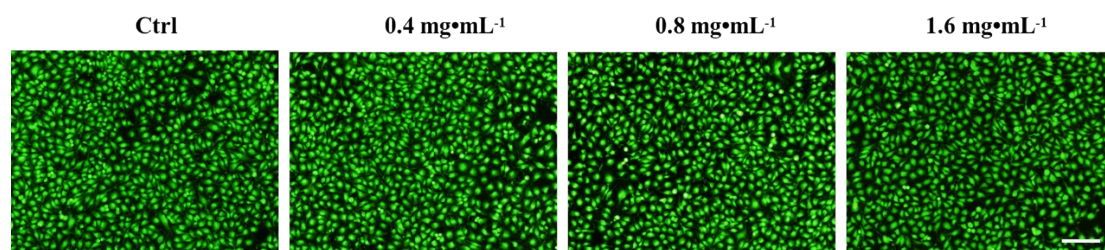

**Fig S12.** Fluorescent microscopic images of the CaPB NPs-treated HUVEC cells stained with SYTO 9 and PI, respectively. The scale bar represents 50  $\mu\text{m}$ .

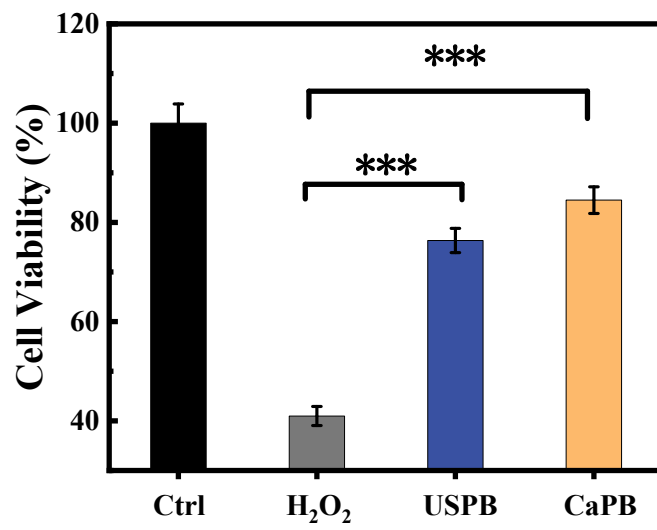

**Fig S13.** Viability of HUVEC cells after different treatments. Data are shown as mean  $\pm$  SD (n = 3). \* $p$ <0.05, \*\* $p$ <0.01, \*\*\* $p$ <0.001.

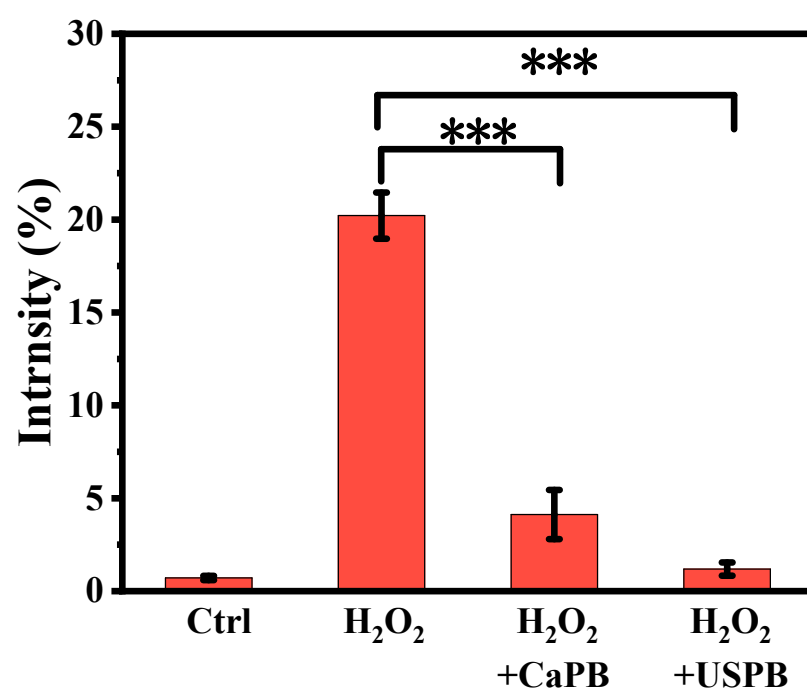

**Fig S14.** Quantitative analysis of the ROS levels using imageJ software. Data are shown as mean  $\pm$  SD ( $n = 3$ ). \* $p < 0.05$ , \*\* $p < 0.01$ , \*\*\* $p < 0.001$ .

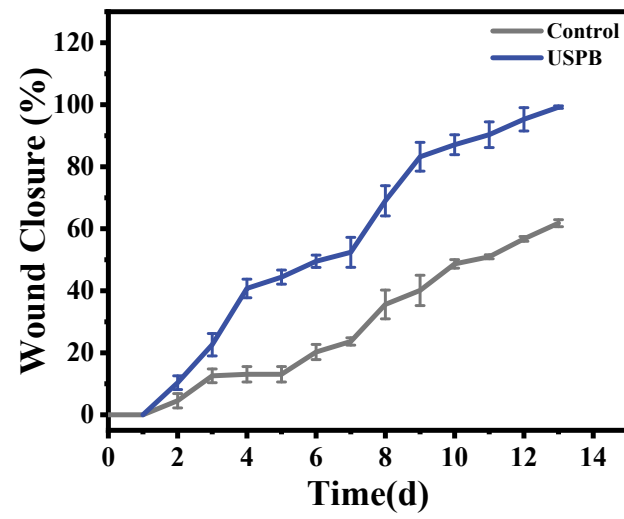

**Fig S15.** Quantification of wound closure rate. Data are shown as mean  $\pm$  SD ( $n = 3$ ).

\* $p < 0.05$ , \*\* $p < 0.01$ , \*\*\* $p < 0.001$ .

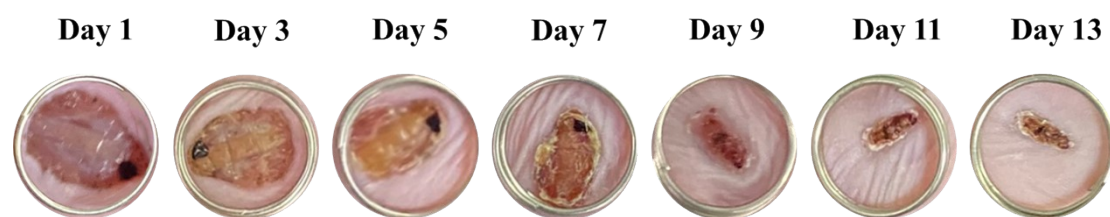

**Fig S16.** Photographs of the wound with the treatment of USPBs.

## Masson Staining

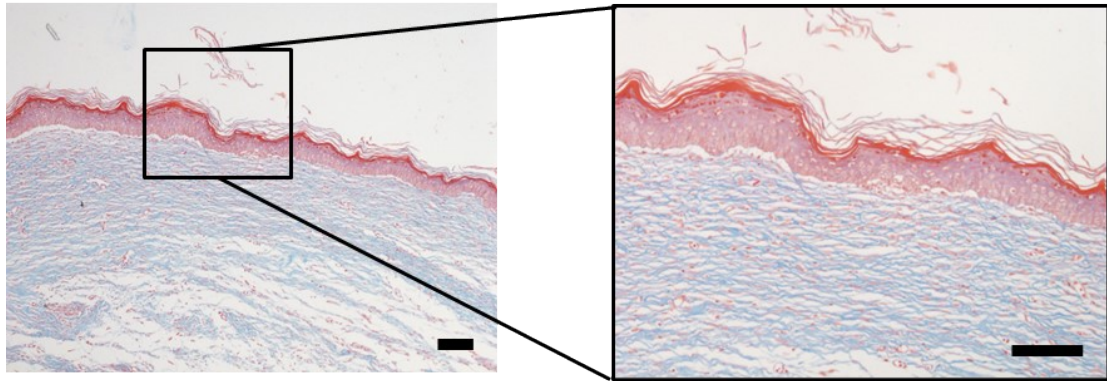

## H&E Staining

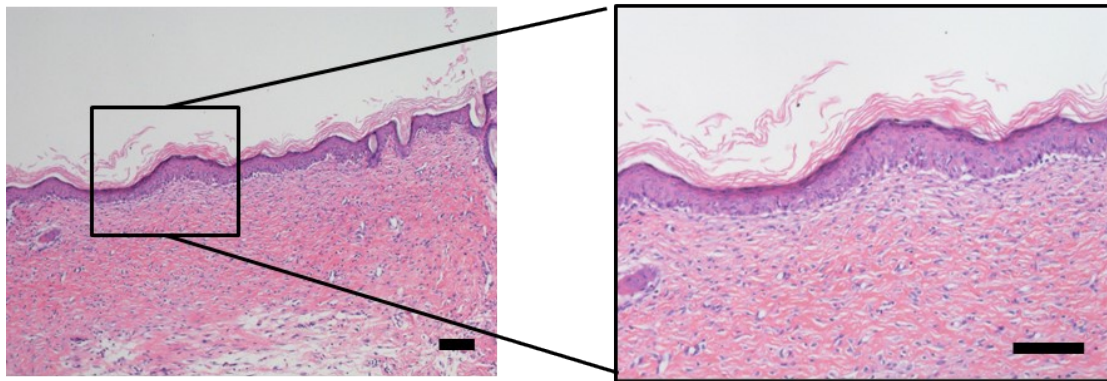

**Fig S17.** Masson staining and H&E staining of wound tissues with the treatment of USPBs. The scale bar represents 100  $\mu\text{m}$ .

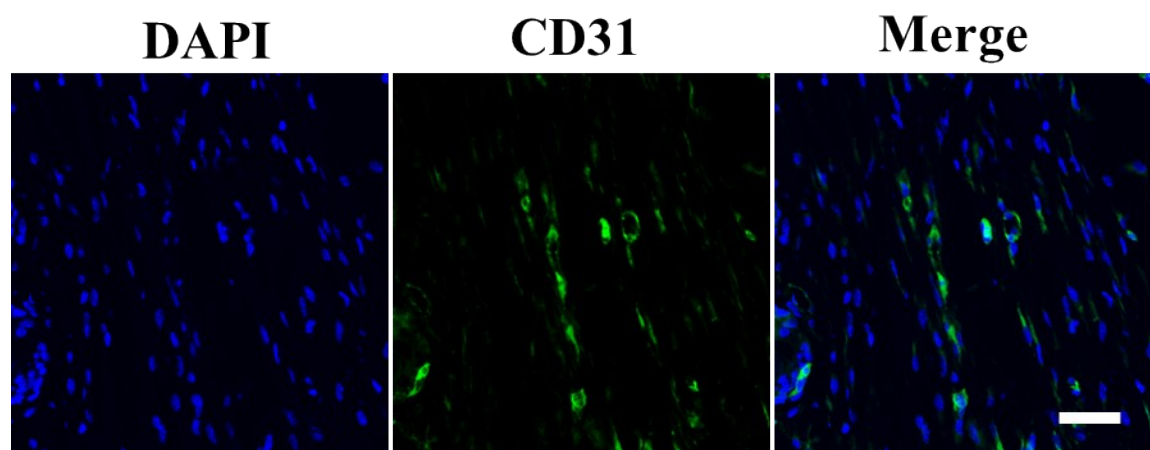

**Fig S18.** Representative confocal images of immunofluorescence staining for CD31 with USPBs treatments. The scale bar represents 50  $\mu\text{m}$ .

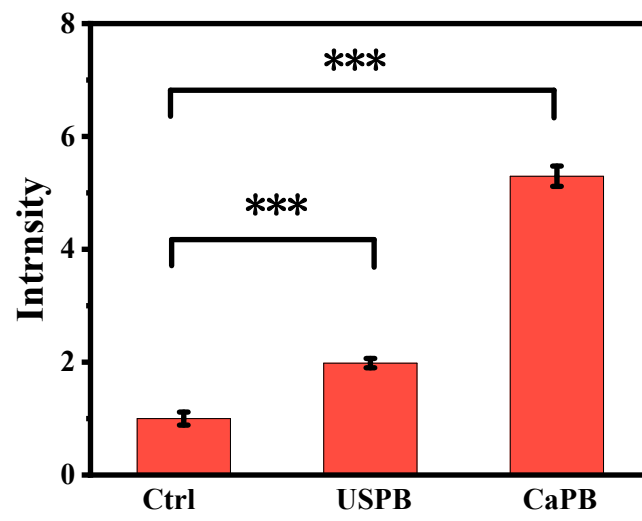

**Fig S19.** Quantitative analysis of the relative coverage area of CD31 for different groups. Data are shown as mean  $\pm$  SD (n = 3). \* $p$ <0.05, \*\* $p$ <0.01, \*\*\* $p$ <0.001.

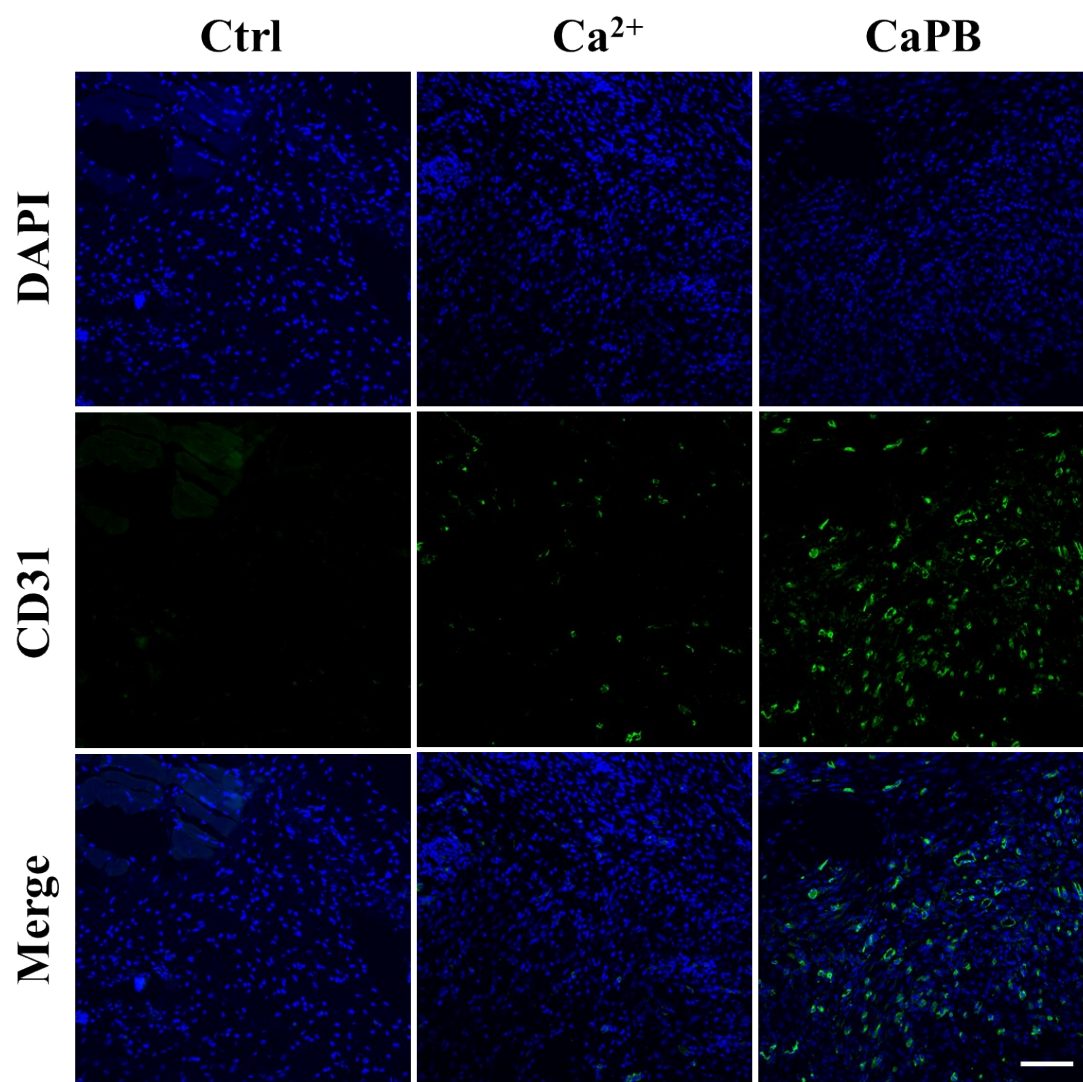

**Fig S20.** Representative confocal images of immunofluorescence staining for CD31.  
The scale bar represents 100  $\mu\text{m}$ .

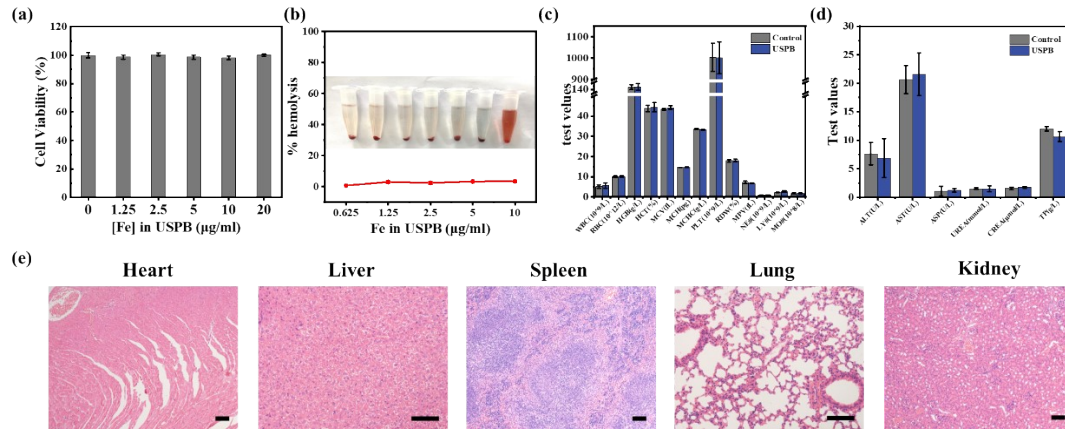

**Fig S21. Biosafety evaluation of USPBs *in vitro* and *in vivo*.** (a) Cell viability of HUVEC cells treated with different concentrations of USPBs for 24 h. Data are shown as mean  $\pm$  SD (n = 3). \* $p$ <0.05, \*\* $p$ <0.01, \*\*\* $p$ <0.001. (b) Hemolysis quantification of USPBs. (c) Blood routine analysis of healthy mice after treatment with USPBs. Data are shown as mean  $\pm$  SD (n = 3). \* $p$ <0.05, \*\* $p$ <0.01, \*\*\* $p$ <0.001. (d) Mice blood biochemical parameters at 13 days after treatment with USPBs. Data are shown as mean  $\pm$  SD (n = 3). \* $p$ <0.05, \*\* $p$ <0.01, \*\*\* $p$ <0.001. (e) H&E staining images of the major organs of mice after treatment with USPBs (13 days after treatment). The scale bar represents 100 µm.
